# Supplementary material
Source: PubMed Central journal article supplement (PMC7593775)
Supplement: NIHMS1638523-supplement-Supplement1.pdf [file NIHMS1638523-supplement-Supplement1.pdf]

# Supplementary Appendix

1  
2  
3  
4  
5  
6  
7  
8  
9  
10  
11  
12  
13  
14  
15  
16  
17  
18  
19  
20  
21  
22  
23  
24  
25  
26  
27  
28  
29  
30  
31  
32  
33  
34  
35  
36  
37  
38  
39  
40  
41  
42  
43  
44  
45

This appendix has been provided by the authors to give readers additional information about their work.

Supplement to: Walker MA, Lareau CA, Ludwig LS, et al. Purifying selection against pathogenic mitochondrial DNA in human T cells. N Engl J Med 2020;383:1556-63. DOI: 10.1056/NEJMoa2001265

46

**SUPPLEMENTARY APPENDIX**

47 **Purifying Selection Against Pathogenic Mitochondrial DNA in Human T cells.**

48 Walker MA, Lareau CA, Ludwig LS et al.

49

50 **TABLE OF CONTENTS**

51 List of investigators page 4

52 Supplementary Methods page 4-7

53 Author Contributions page 7

54 Figure S1: page 8

55 A3243G heteroplasmy across all cell types and restricting to cells with  $\geq 100x$  mtDNA coverage.

56 Figure S2: page 9

57 Cumulative distributions of T cell-specific reduction in A3243G heteroplasmy in MELAS patients.

58 Figure S3: page 10

59 Permutation analysis of the two sample Kolmogorov-Smirnov D statistic.

60 Figure S4: page 11

61 Subdivision of T cell lineages reveals consistently lower percent A3243G heteroplasmy across all  
62 patients.

63 Figure S5: page 12

64 Lack of correlation between A3243G heteroplasmy and mtDNA copy number in major PBMC cell  
65 types.

66 Figure S6: page 13

67 Lack of correlation between A3243G heteroplasmy and mtDNA genome coverage and copy  
68 number in PBMCs.

69 Table S1: page 14

70 Clinical testing results and phenotypes of patients.

71 Table S2: page 15

72 Patient clinical complete blood cell counts.

- 74
- 75
- 76
- 77
- 78
- 79
- 80
- 81
- 82
- 83
- 84
- 85
- 86
- 87
- 88
- 89
- 90
- 91
- 92
- 93
- 94
- 95
- 96
- 97
- 98
- 99
- 100
- 101
- 102
- 103
- 104
- 105
- 106
- 107
- 108
- 109
- 110
- 111
- 112
- 113
- 114
- 115
- 116
- 117
- 118

119 **LIST OF INVESTIGATORS**

120 Melissa A. Walker, Caleb A. Lareau, Leif S. Ludwig, Amel Karaa, Vijay G. Sankaran, Aviv  
121 Regev, Vamsi K. Mootha

122

123

124 **SUPPLEMENTARY METHODS**

125

126 **Oversight**

127 This study was approved by the Massachusetts General Hospital Institutional Review Board  
128 (Protocol 2016P001517).

129

130 **Single cell accessible chromatin and mitochondrial genotyping**

131 Venous blood was collected from patients at clinical baseline using sodium heparin CPT tubes  
132 (BD Biosciences #362753) and peripheral blood mononuclear cells (PBMCs) were purified per  
133 manufacturer instructions. PBMCs were cryopreserved prior to use. Upon thawing, cells were  
134 stained with a fixable viability dye (Zombie Green, Biolegend #423111) and APC-conjugated anti-  
135 hCD45 (Biolegend #304012). After washing, PBMCs were fixed in 1% formaldehyde (FA;  
136 ThermoFisher #28906) in PBS for 10 min at RT, quenched with glycine solution to a final  
137 concentration of 0.125M before washing cells once with PBS supplemented with 0.4% bovine  
138 serum albumin, and subsequently in PBS alone via centrifugation at 400g, 5 min, 4C.  
139 Fluorescence-Activated Cell Sorting (FACS) was then performed to exclude dead and non-  
140 leukocyte cells.

141

142 MtscATAC-seq libraries were generated using the 10x Chromium Controller and the Chromium  
143 Single Cell ATAC Library & Gel Bead Kit (#1000111) according to the manufacturer's  
144 instructions (CG000169-Rev C; CG000168-Rev B) but with the following modifications: 1.5ml –  
145 2ml DNA LoBind tubes (Eppendorf) were used to wash PBMCs in PBS and downstream  
146 processing steps. Cells were subsequently treated with lysis buffer (10mM Tris-HCL pH 7.4,  
147 10mM NaCl, 3mM MgCl<sub>2</sub>, 0.1% NP40, 1% BSA) for 3 min on ice, followed by adding 1ml of  
148 chilled wash buffer and inversion (10mM Tris-HCL pH 7.4, 10mM NaCl, 3mM MgCl<sub>2</sub>, 1% BSA)  
149 before centrifugation at 500g, 5 min, 4C. The supernatant was discarded, and cells were diluted in  
150 1x Diluted Nuclei buffer (10x Genomics) before counting using Trypan Blue and a Countess II FL  
151 Automated Cell Counter. If large cell clumps were observed a 40µm Flowmi cell strainer was used

152 prior to processing cells according to the Chromium Single Cell ATAC Solution user guide with  
153 no additional modifications. Briefly, after tagmentation, the cells were loaded on a Chromium  
154 controller Single-Cell Instrument to generate single-cell Gel Bead-In-Emulsions (GEMs) followed  
155 by linear polymerase chain reaction (PCR) as described in the 10x User Guide. After breaking the  
156 GEMs, the barcoded tagmented DNA was purified and further amplified to enable sample indexing  
157 and enrichment of scATAC-seq libraries. The final libraries were quantified using a Qubit dsDNA  
158 HS Assay kit (Invitrogen) and a High Sensitivity DNA chip run on a Bioanalyzer 2100 system  
159 (Agilent). Paired-end sequencing was performed using an Illumina NextSeq 500 platform using  
160 2x 72 base reads.

161

## 162 **Data Analysis**

163 Raw sequencing reads were demultiplexed and aligned to the hg19 reference genome using the  
164 CellRanger-ATAC v1.0 software. We identified cells as barcodes that met the following criteria:  
165 (1) presence of at least 1,000 unique fragments mapping to the nuclear genome; (2) at least 40%  
166 of nuclear fragments overlapping a previously-established chromatin accessibility peak set in the  
167 hematopoietic system<sup>1</sup>; and (3) a mean mtDNA coverage of at least 20x. From the output of the  
168 CellRanger-ATAC call, we quantified heteroplasmy at all loci, including A3243G, in the  
169 mitochondrial genome using the mgatk package, which is available at  
170 <https://github.com/caleblareau/mgatk>. For heteroplasmy analyses, cells with less than 20x  
171 coverage at position m.3243 in the mtDNA and outliers with m.3243 coverage of >1.5 interquartile  
172 ranges above the third quartile were excluded to avoid artefactual sequencing multiplets.

173 We applied a computational strategy to identify cell types independent of possible alterations in  
174 chromatin accessibility caused by the pathogenic allele. This was achieved by first defining axes  
175 of variation in a healthy individual and then projecting new (patient) cells onto this existing space,  
176 utilizing Latent Semantic Indexing (LSI) and Uniform Manifold Approximation and Projection  
177 (UMAP) as previously described<sup>2</sup>. Specifically, we first generated a binarized matrix of chromatin  
178 accessibility peaks for ~10,000 PBMCs derived from a healthy donor<sup>3</sup>, which were reduced into  
179 25 dimensions via LSI followed by further reduction to 2 dimensions via UMAP for visualization.  
180 Using the 25 dimensions in LSI space we constructed a  $k$  nearest neighbors graph ( $k=20$ ), and

181 obtained twelve data-driven clusters by a Louvian community clustering on this graph, which we  
182 annotated into five major cell types expected to be observed in PBMCs.

183 The selection of  $k=20$  was chosen as it serves as a default value consistently used in common  
184 single-cell analyses tools, including the statistical frameworks used herein<sup>2,4</sup>. To verify that the  
185 results are not sensitive to this choice of parameter, we computed the Adjusted Rand Index (ARI)  
186 for values of  $k = 10, 15, 20, 25,$  and  $30$  to compare the clustering results under variable choice of  
187 this parameter. An ARI value of  $0$  is indicative of no concordance between clusters (random)  
188 whereas a value of  $1$  represents perfect concordance. When analyzing these in the context of our  
189 data, we found that for all values of  $k$ , the ARI to the definitions used in the manuscript exceed  
190  $0.9$ , reflective of very robust results irrespective of the choice of parameter for this value.

191 Next, we classified all patient cell types by projecting chromatin accessibility data onto this 25-  
192 dimensional space and assigning cell types based on minimum distance to cluster medoids. Finally,  
193 two dimensional representations of patient data were produced by projecting the 25 LSI  
194 dimensions onto the pre-trained UMAP model as previously reported<sup>2</sup>. In our assignment of cells  
195 to their closest reference cluster, we used the minimum Euclidean distance between the reference  
196 medoid and the individual cell in the reduced dimension space defined by the LSI components.  
197 While we did not require a minimum distance for the classification, we did observe a mean 2-fold  
198 distance between the individual cells and closest reference cluster medoid ( $0.011$ ) compared to the  
199 second closest cluster medoid ( $0.025$ ). These results support that the classification was robust in  
200 this high-dimensional space.

201  
202 To test for correlations between A3243G heteroplasmy and our proxy of mtDNA copy number  
203 (the ratio of reads aligning to the mitochondrial and nuclear genomes), we calculated Spearman  
204 rank correlation coefficients for each dataset in R using `cor.test` (Package `stats` version 3.5.1 Index).  
205 We estimated 95% confidence intervals from the distributions of the test statistic from 10,000  
206 datasets generated from our observed dataset by bootstrapping with replacement. These  
207 computations were performed using the `boot` function (Package `boot` version 1.3-23) and the  
208 `boot.ci` function, basic 95% confidence intervals (Package `boot` version 1.3-23). We calculated

209 critical values ( $r_s$ ) for Spearman rank correlation coefficients for  $\alpha = 0.05$  as follows:  $r_s = \pm z / (\sqrt{n - 1})$ .

211

### 212 **Bulk sequencing and heteroplasmy analysis**

213 We stained cryopreserved PMBCs with anti-human CD45-APC (Biolegend #304012), OKT3  
214 antihuman CD3e -FITC (Biolegend #317305), and antihuman CD56 Pacific Blue™ clone HCD56  
215 (Biolegend #318325). FACS was then used to purify T cell and T cell-depleted PBMC populations  
216 from which DNA was extracted (Qiagen #69504). Small amplicons containing the m.3243 locus  
217 and surrounding region were generated by PCR using Phusion Mastermix (NEB) per manufacturer  
218 instructions and amplifying for 35 cycles at an annealing temperature of 60°C. We then used to  
219 generate libraries for sequencing on an Illumina MiSeq platform at Massachusetts General  
220 Hospital or using a commercial vendor (Genewiz). Heteroplasmy was called from this data using  
221 Samtools<sup>5</sup>. Primer sequences were 5'-CGCCTTCCCCCGTAAATGA-3' (forward), 5'-  
222 GGGGCCTTTGCGTAGTTGT-3' (reverse) for amplicon amplification and next generation  
223 sequencing.

224

225 **Author Contributions:** MAW designed and performed experiments, analyses, provided clinical  
226 insights, and wrote manuscript, CAL, and LSL designed and performed experiments, analyses,  
227 and wrote manuscript, AK provided clinical insights, VGS, AR, and VKM designed and  
228 supervised experiments, analyses, and wrote manuscript

229

# Supp. Fig. 1

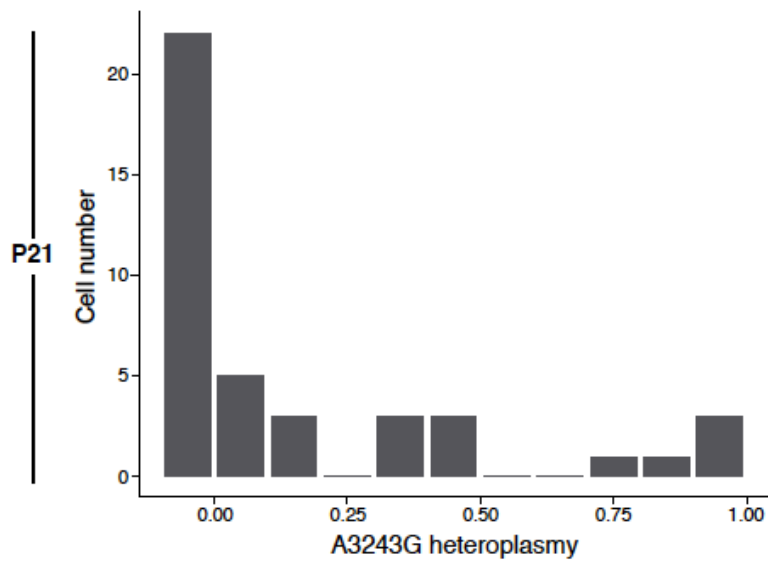

230

231 **Figure S1. A3243G heteroplasmy across all cell types in patient P21, restricting to cells with**  
232  **$\geq 100x$  mtDNA. 41 cells in the P21 dataset have  $\geq 100x$  and  $< 1.5$  interquartile ranges above the**  
233 **third percentile coverage at m.3243.**

234



## Supp. Fig. 2

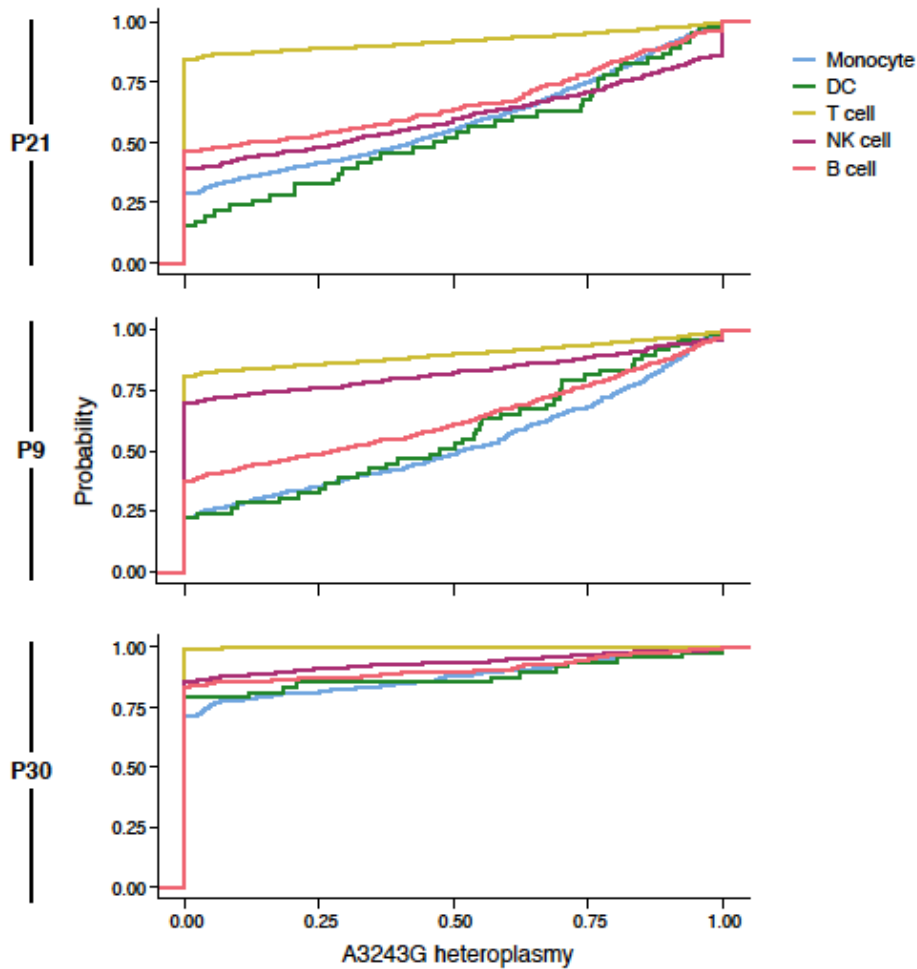

235

236

237

238

239

**Figure S2. Cumulative distributions of A3243G heteroplasmy in MELAS patients.** Cumulative distributions are stratified by cell type for the three indicated patient PBMCs profiled with mtscATAC-seq (DC = dendritic cell, NK= natural killer).

# Supp. Fig. 3

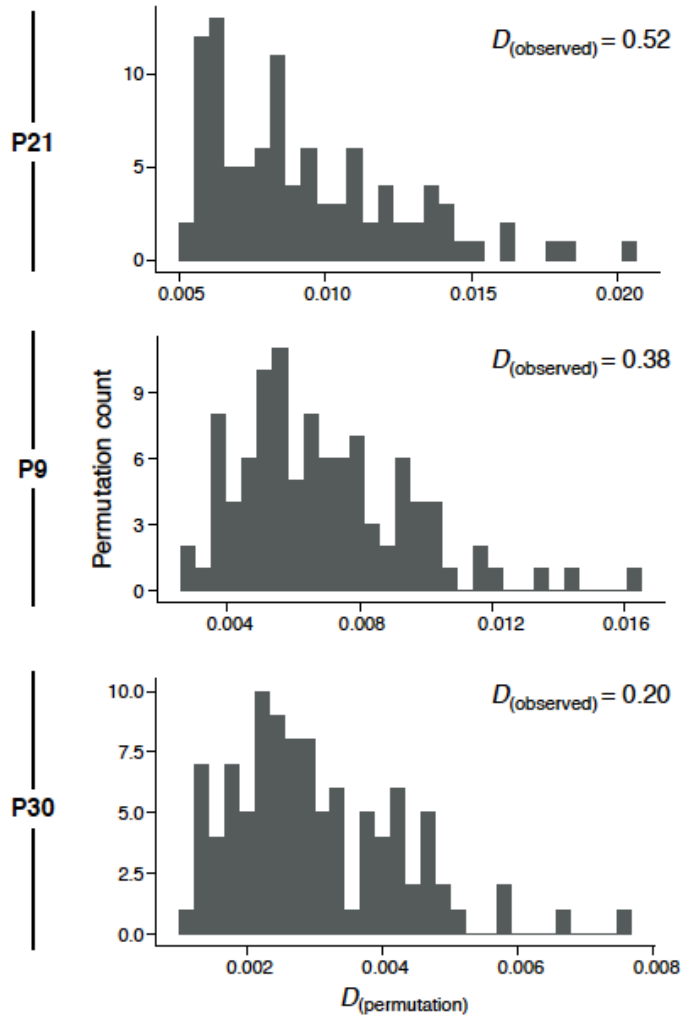

240  
241  
242  
243  
244  
245  
246  
247

**Figure S3. Permutation analysis of the two sample Kolmogorov-Smirnov D statistic.** We permuted the cell type label (i.e., T cell or not T cell, preserving the proportion of T cells observed in the respective patient). For each permuted dataset we computed the two-sample K-S test statistic for the heteroplasmy CDF of “T cells” versus “all cells” under the permutation. We repeated this procedure 100 times to generate a null distribution of K-S statistics that can be compared to the statistic obtained with the real data ( $D_{obs}$ ).

# Supp. Fig. 4

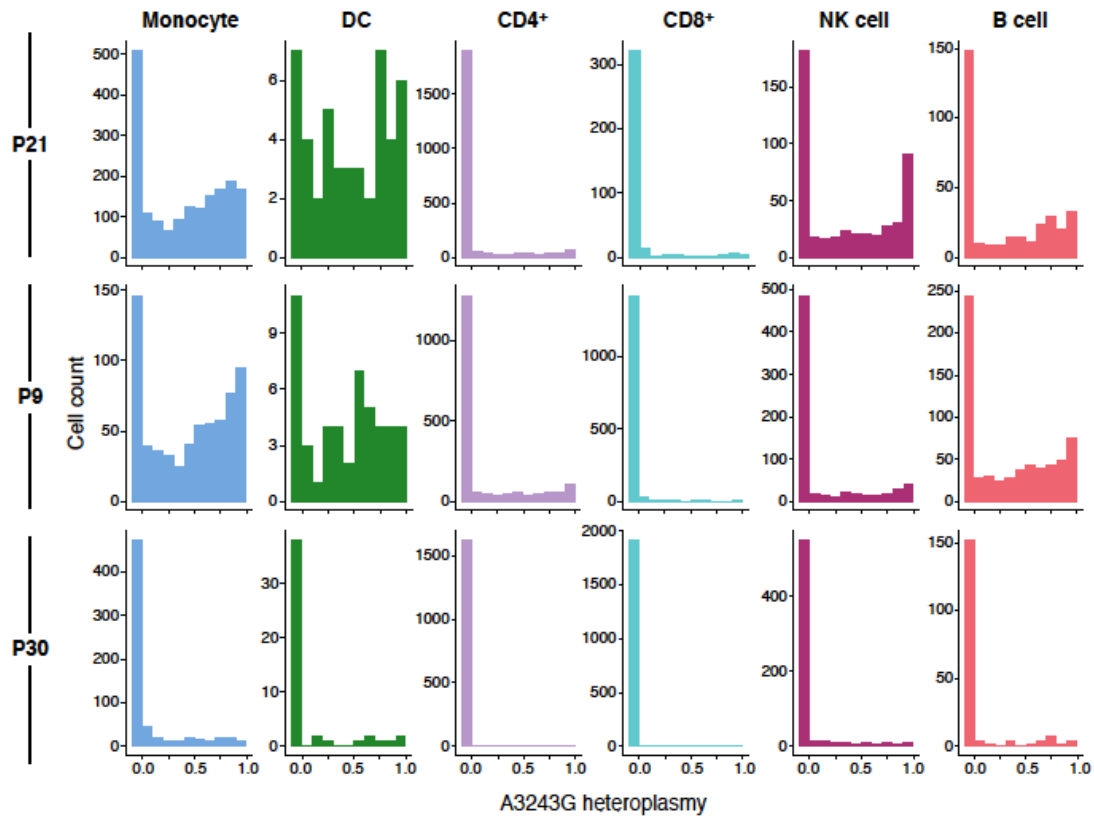

248  
249  
250  
251  
252

**Figure S4. Subdivision of T cell lineages.** Histograms show per cell A3243G heteroplasmy fraction in CD4+ and CD8+ T cells compared to other populations (DC = dendritic cell, NK= natural killer).

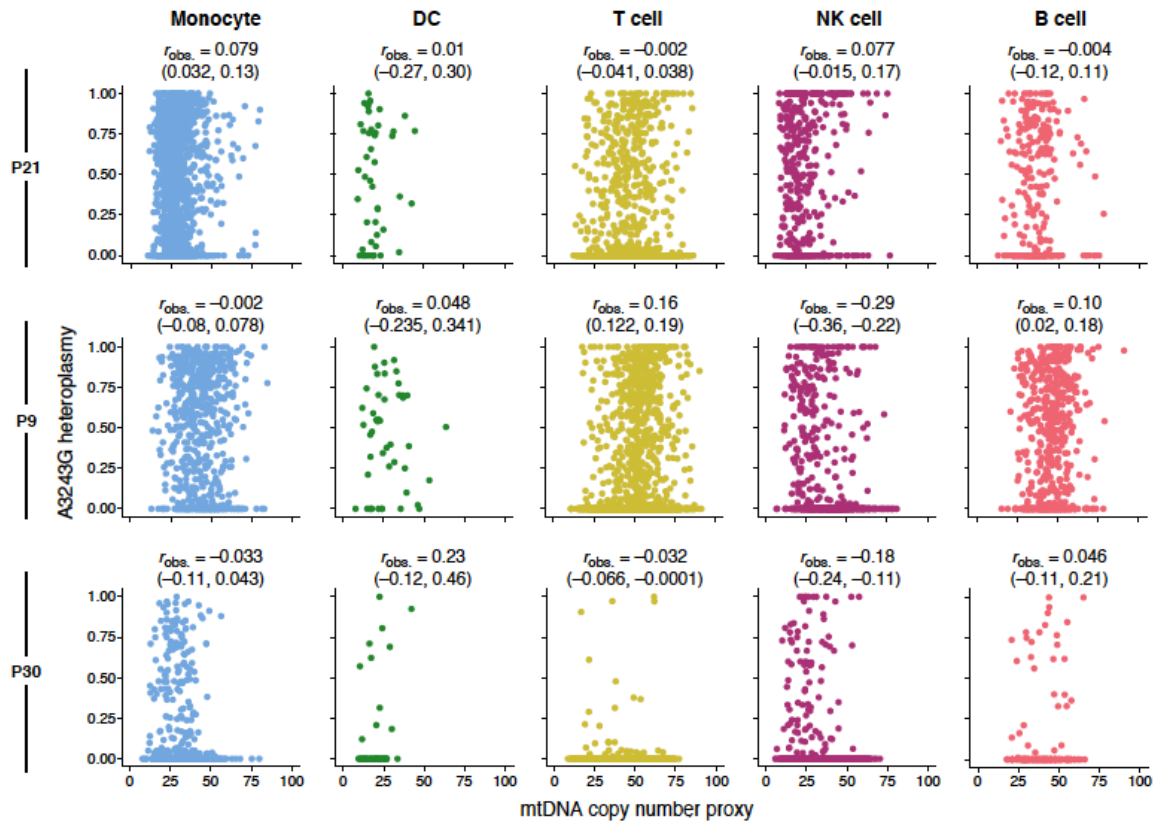

254

255

256 **Figure S5. Lack of correlation between A3243G heteroplasmy and mtDNA copy number in**  
 257 **major PBMC cell types.** For each patient P21, P9, and P30, per cell A3243G percent  
 258 heteroplasmy (y axis) is plotted against the percentage of reads mapping to the mitochondrial  
 259 genome (as a proxy of mtDNA copy number (CN) for each patient). Observed Spearman rank  
 260 correlation coefficients ( $r_{obs}$ ) are indicated in each panel with bootstrapped 95% confidence  
 261 intervals shown in parentheses (DC = dendritic cell, NK = natural killer).

262

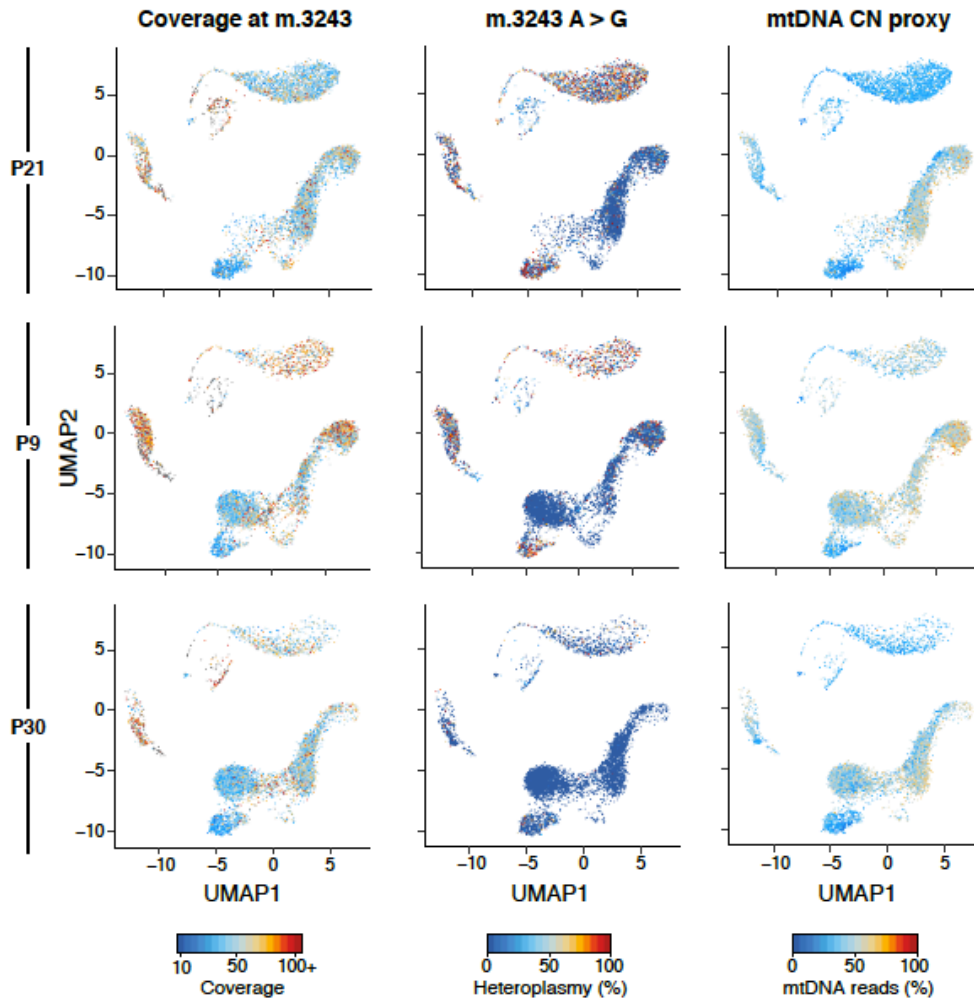

264  
 265  
 266  
 267  
 268  
 269  
 270  
 271  
 272

**Figure S6. Lack of correlation between A3243G heteroplasmy and mtDNA genome coverage and copy number in PBMCs.** UMAPs for each indicated patient's PBMCs are presented colored by mitochondrial genomic coverage at position m.3243 (left column), percentage A3243G heteroplasmy (middle), and percentage of reads mapping to the mitochondrial genome (as a proxy of mtDNA copy number (CN), right).

| ID  | Age | Sex | Blood | Oral Rinse | Skeletal Muscle | Phenotype                                                                                          |
|-----|-----|-----|-------|------------|-----------------|----------------------------------------------------------------------------------------------------|
| P9  | 29y | m   | 39%   |            |                 | stroke, epilepsy, SNHL, urinary dysfunction, cardiomyopathy, HA, ptosis, fatigue                   |
| P21 | 35y | m   | +     |            |                 | stroke, FTT, steatohepatitis                                                                       |
| P30 | 60y | m   |       |            | 77%             | stroke, cardiomyopathy, ptosis, bilateral SNHL, DM, myopathy                                       |
| P31 | 47y | f   |       | 25%        |                 | SNHL, HA, possible GI dysmotility, autonomic dysfunction, fatigue                                  |
| P33 | 65y | f   |       | 22.5%      |                 | mild myopathy, ptosis, GI dysmotility, deafness, DM, fatigue, exercise intolerance, HA             |
| P36 | 53y | f   | 20%   |            |                 | GI dysmotility, HA, burning mouth syndrome, SNHL, fatigue, autonomic dysfunction, myopathy, ptosis |
| P37 | 19y | f   | 46%   |            |                 | seizures, lactate peak on MRS, cardiomyopathy                                                      |
| P38 | 33y | m   | +     |            |                 | DM, hearing loss                                                                                   |
| P40 | 35y | m   | +     |            |                 | myoclonus, hearing loss                                                                            |

274 **Table S1. Clinical testing results and phenotypes of patients.** Clinical heteroplasmy testing  
275 results for indicated tissue specimens are summarized (data shown where available). The notation  
276 “+” denotes presence of the A3243G mutation by restriction-enzyme based molecular blood  
277 testing, without heteroplasmy quantification. Patient clinical phenotypes are summarized.  
278 Abbreviations include: m = male, f = female, SNHL = sensorineural hearing loss, HA = headache,  
279 FTT = failure to thrive, DM = diabetes mellitus, GI = gastrointestinal, MRS = magnetic resonance  
280 spectroscopy.

281

282

283

| Component        | Reference Range    | P9<br>Mean | SD    | P21<br>Mean | SD    | P30<br>Mean | SD    | P31<br>Mean | SD    | P33<br>Mean | SD | P36<br>Mean | SD   | P37<br>Mean | SD    | P38<br>Mean | SD | P40<br>Mean | SD   |
|------------------|--------------------|------------|-------|-------------|-------|-------------|-------|-------------|-------|-------------|----|-------------|------|-------------|-------|-------------|----|-------------|------|
| WBC              | 4.5 - 11.0 K/uL    | 10.63      | 1.92  | 10.29       | 1.36  | 10.40       | 0.92  | 9.55        | 5.61  | 5.63        |    | 7.21        | 0.48 | 9.43        | 1.54  | 6.3         |    | 8.55        | 2.69 |
| RBC              | 4.50 - 5.90 M/uL   | 4.69       | 0.23  | 4.86        | 0.12  | 2.82        | 0.14  | 4.93        | 0.11  | 4.54        |    | 4.26        |      | 3.80        | 0.37  | 5.2         |    | 5.19        | 0.06 |
| Hgb              | 13.5 - 17.5 g/dL   | 13.31      | 0.71  | 14.30       | 0.40  | 8.16        | 0.42  | 13.33       | 0.36  | 13.70       |    | 12.80       | 0.42 | 11.39       | 1.08  | 15.3        |    | 15.55       | 0.21 |
| HCT              | 41.0 - 53.0 %      | 38.57      | 2.23  | 41.07       | 1.33  | 26.30       | 1.47  | 41.30       | 1.33  | 39.40       |    | 38.45       | 1.06 | 34.45       | 2.61  | 43.2        |    | 45.90       | 0.71 |
| PLT              | 150 - 400 K/uL     | 241.78     | 29.07 | 245.00      | 29.05 | 311.75      | 37.74 | 302.00      | 15.03 | 283.00      |    | 272.50      | 0.71 | 344.45      | 82.73 | 219         |    | 224.00      | 1.41 |
| MCV              | 80.0 - 100.0 fL    | 82.16      | 1.84  | 84.43       | 1.29  | 93.15       | 0.82  | 83.73       | 1.20  | 86.80       |    | 93.50       | 2.12 | 90.80       | 2.51  | 83          |    | 88.45       | 0.35 |
| MCH              | 26.0 - 34.0 pg     | 28.36      | 0.44  | 29.40       | 0.85  | 28.91       | 0.49  | 27.03       | 0.17  | 30.20       |    | 30.80       |      | 29.97       | 0.36  | 29.3        |    | 29.95       | 0.78 |
| MCHC             | 31.0 - 37.0 g/dL   | 34.55      | 1.09  | 34.83       | 0.67  | 31.03       | 0.49  | 32.28       | 0.52  | 34.80       |    | 33.30       | 0.14 | 33.02       | 0.77  | 35.4        |    | 33.90       | 0.99 |
| RDW              | 11.5 - 14.5 %      | 12.29      | 0.07  | 12.17       | 0.12  | 17.54       | 0.45  | 14.45       | 0.30  | 12.10       |    | 13.15       | 0.49 | 12.02       | 0.18  | 13.1        |    | 12.45       | 0.35 |
| MPV              | 8.4 - 12.0 fl      | 9.44       | 0.16  | 9.70        | 0.10  |             | 0.71  | 9.70        | 0.23  | 9.20        |    |             |      | 10.09       | 0.31  | 9.9         |    | 9.90        | 0.28 |
| NRBC% (auto)     | 0 - 0.20 /100 WBCs | 0.00       | 0.00  | 0.00        | 0.00  |             | 0.56  | 0.00        | 0.00  | 0.00        |    | 0.00        | 0.00 | 0.00        | 0.00  |             |    | 0.00        | 0.00 |
| NRBC#, auto      | 0 - 0.01 K/uL      | 0.00       | 0.00  | 0.00        | 0.00  |             | 0.59  | 0.00        | 0.00  | 0.00        |    | 0.00        | 0.00 | 0.00        | 0.00  |             |    | 0.00        | 0.00 |
| Neutro           | 40 - 70 %          |            |       | 58.25       | 7.28  | 75.74       | 0.29  | 65.83       | 15.43 |             |    |             |      |             |       |             |    | 73.00       |      |
| Lymphs           | 22 - 44 %          |            |       | 23.40       | 5.52  | 14.54       | 0.72  | 22.50       | 12.30 |             |    |             |      |             |       |             |    | 21.80       |      |
| Monos            | 4 - 11 %           |            |       | 10.85       | 0.35  | 4.71        | 0.15  | 8.70        | 2.36  |             |    |             |      |             |       |             |    | 4.50        |      |
| Eos              | 0 - 8 %            |            |       | 5.10        |       |             | 0.04  | 2.23        | 1.46  |             |    |             |      |             |       |             |    | 0.30        |      |
| Basos            | 0 - 3 %            |            |       | 0.50        | 0.00  | 1.07        | 0.08  | 0.37        | 0.06  |             |    |             |      |             |       |             |    | 0.10        |      |
| Granulo, imm (%) | 0.0 - 0.9 %        |            |       | 0.40        |       | 7.87        | 0.03  | 0.37        | 0.12  |             |    |             |      |             |       |             |    |             |      |
| Neutro#          | 1.8 - 7.7 K/uL     |            |       | 6.45        | 1.16  | 1.51        |       | 7.64        | 6.37  |             |    |             |      |             |       |             |    | 7.63        |      |
| Lymph#           | 1.0 - 4.8 K/uL     |            |       | 2.57        | 0.46  | 0.49        |       | 1.87        | 0.34  |             |    |             |      |             |       |             |    | 2.28        |      |
| Mono#            | 0.2 - 1.2 K/uL     |            |       | 1.20        | 0.11  | 0.41        |       | 0.85        | 0.32  |             |    |             |      |             |       |             |    | 0.47        |      |
| Eos#             | 0.0 - 0.9 K/uL     |            |       | 0.73        | 0.21  | 0.11        |       | 0.18        | 0.06  |             |    |             |      |             |       |             |    | 0.03        |      |
| Baso#            | 0.0 - 0.3 K/uL     |            |       | 0.06        | 0.01  |             |       | 0.04        | 0.01  |             |    |             |      |             |       |             |    | 0.01        |      |
| Granulo, imm     | 0.00 - 0.10 K/uL   |            |       | 0.05        |       |             |       | 0.04        | 0.04  |             |    |             |      |             |       |             |    |             |      |

284  
285  
286  
287  
288  
289  
290  
291  
292  
293  
294  
295

**Table S2. Patient clinical complete blood cell counts** (where available). The mean value of all measured parameters is reported with standard deviation (SD) when multiple measurements were available. WBC = white blood cells, RBC = red blood cells, HGB = hemoglobin, HCT = hematocrit, PLT = platelets, MCV = mean corpuscular volume, MCH = mean corpuscular hemoglobin, MCHC = mean corpuscular hemoglobin concentration, RDW = red cell distribution width, MPV = mean platelet volume, NRBC= nucleated red blood cell, NEUTRO = neutrophils, LMYPHS = lymphocytes, MONOS = monocytes, EOS = eosinophils, BASOS = basophils, GRANULO, IMM = granulocytes, immature, k = thousand, uL = microliter, g = gram, dL = deciliter, fl = femtoliter

296 **REFERENCES:**

- 297 1. Ulirsch JC, Lareau CA, Bao EL, et al. Interrogation of human hematopoiesis at single-cell  
298 and single-variant resolution. *Nat Genet* 2019;
- 299 2. Granja JM, Klemm S, McGinnis LM, et al. Single-cell multiomic analysis identifies  
300 regulatory programs in mixed-phenotype acute leukemia. *Nat. Biotechnol.* 2019;
- 301 3. Satpathy AT, Granja JM, Yost KE, et al. Massively parallel single-cell chromatin  
302 landscapes of human immune cell development and intratumoral T cell exhaustion. *Nat*  
303 *Biotechnol* 2019;
- 304 4. Stuart T, Butler A, Hoffman P, et al. Comprehensive Integration of Single-Cell Data. *Cell*  
305 2019;
- 306 5. Li H, Handsaker B, Wysoker A, et al. The Sequence Alignment/Map format and  
307 SAMtools. *Bioinformatics* 2009;
- 308
